# Supplementary material for: Cationic nanomicelles derived from Pluronic F127 as delivery vehicles of Chinese herbal medicine active components of ursolic acid for colorectal cancer treatment
Source: Royal Society of Chemistry journal article supplement (doi:10.1039/c8ra01071d), 2018-01-01
Supplement: c8ra01071d1.pdf [file c8ra01071d1.pdf]

Electronic Supplementary Information (ESI)

## **Cationic nanomicelles derived from Pluronic F127 as delivery vehicles of Chinese herbal medicine active components of ursolic acid for colorectal cancer treatment**

Zhaokun Yan,<sup>‡a</sup> Qingtang Wang,<sup>‡b,c</sup> Xiaolong Liu,<sup>b,c</sup> Jun Peng,<sup>a,d</sup> Qin Li,<sup>b,c</sup> Ming Wu,<sup>\*b,c</sup> Jiumao Lin<sup>\*a,d</sup>

---

<sup>a</sup> Academy of Integrative Medicine, Fujian University of Traditional Chinese Medicine, Fuzhou 350122, P.R. China. E-mail: [jiumaolin@hotmail.com](mailto:jiumaolin@hotmail.com)

<sup>b</sup> The United Innovation of Mengchao Hepatobiliary Technology Key Laboratory of Fujian Province, Mengchao Hepatobiliary Hospital of Fujian Medical University, Fuzhou 350025, P. R. China. E-mail: [wmmj0419@163.com](mailto:wmmj0419@163.com)

<sup>c</sup> The Liver Center of Fujian Province, Fujian Medical University, Fuzhou 350025, P. R. China.

<sup>d</sup> Fujian Key Laboratory of Integrative Medicine on Geriatrics, Fujian University of Traditional Chinese Medicine, Fuzhou, Fujian 350122, P.R. China

<sup>‡</sup> These authors contribute equally to this work.

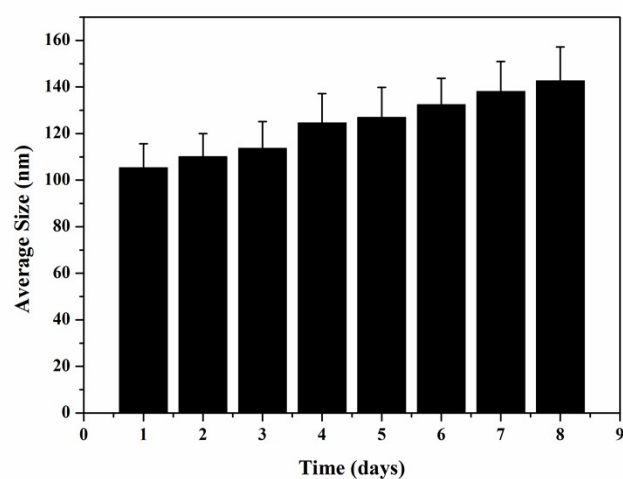

**Figure S1.** Hydrodynamic size of FUP in PBS measured by DLS, after stored for different times ranged from 1 d to 8 d.

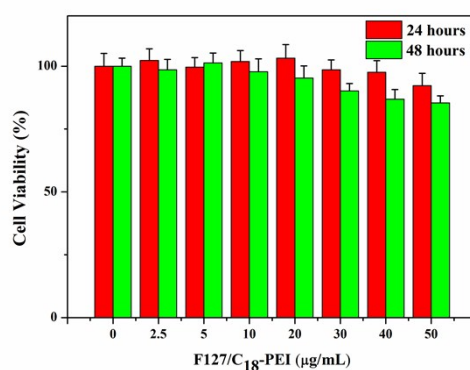

**Figure S2.** *In vitro* cytotoxicity of blank vehicle of F127/C<sub>18</sub>-PEI against NIH3T3 cells, after 24 or 48 hours of incubation. Data are expressed as the mean  $\pm$  standard deviation (error bars) from at least three independent experiments.

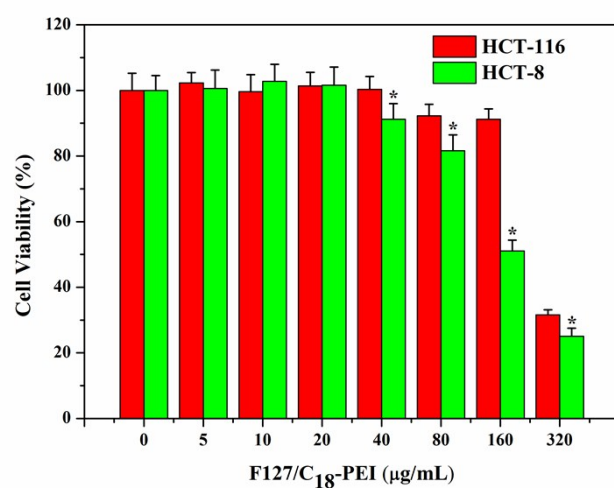

**Figure S3.** *In vitro* cytotoxicity of cationic blank vehicle of F127/C<sub>18</sub>-PEI against HCT-116 or HCT-8 cells, after 48 hours of incubation. Data are expressed as the mean  $\pm$  standard deviation (error bars) from at least three independent experiments.

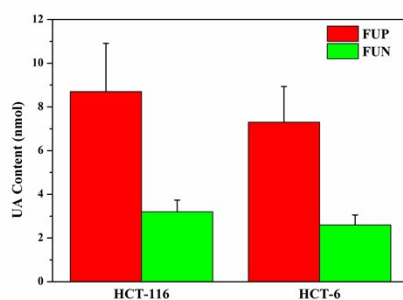

**Figure S4.** UA content in HCT-116 and HCT-8 cells incubated with FUP or FUN for 4 hours.
